# Supplementary material for: Estradiol-ERβ2 signaling axis confers growth and migration of CRPC cells through TMPRSS2-ETV5 gene fusion
Source: publisher site journal article supplement (doi:10.18632/oncotarget.11355), 2016-08-17
Supplement: Supplementary file 2 [file v=1505313831]

## Estradiol-ER $\beta$ 2 signaling axis confers growth and migration of CRPC cells through TMPRSS2-ETV5 gene fusion

Hogyoun Kim<sup>1</sup>, Amrita Datta<sup>1</sup>, Sudha Talwar<sup>1</sup>, Sarmad N. Saleem<sup>1</sup>, Debasis Mondal<sup>2</sup> and Asim B. Abdel-Mageed<sup>1,2,3</sup>

<sup>1</sup>Department of Urology, Tulane University School of Medicine, New Orleans, Louisiana, 70112, USA

<sup>2</sup>Department of Pharmacology, Tulane University School of Medicine, New Orleans, Louisiana, 70112, USA

<sup>3</sup>Tulane Cancer Center, Tulane University School of Medicine, New Orleans, Louisiana, 70112, USA

**Correspondence to:** Asim B. Abdel-Mageed, **email:** amageed@tulane.edu

**Keywords:** *estrogen, ER $\beta$ 2, TMPRSS2:ETV5, IGF-1R, prostate cancer*

**Received:** September 02, 2015

**Accepted:** July 26, 2016

**Published:** August 17, 2016

Copyright: Kim et al. This is an open-access article distributed under the terms of the Creative Commons Attribution License 3.0 (CC BY 3.0), which permits unrestricted use, distribution, and reproduction in any medium, provided the original author and source are credited.

### ABSTRACT

**Estrogen receptor beta (ER $\beta$ ) splice variants are implicated in prostate cancer (PC) progression; however their underlying mechanisms remain elusive. We report that non-canonical activation of estradiol (E<sub>2</sub>)-ER $\beta$ 2 signaling axis primes growth, colony-forming ability and migration of the androgen receptor (AR)-null castration-resistant PC (CRPC) cells under androgen-deprived conditions (ADC). The non-classical E<sub>2</sub>-ER $\beta$ 2 mediates phosphorylation and activation of Src-IGF-1R complex, which in turn triggers p65-dependent transcriptional upregulation of the androgen-regulated serine protease *TMPRSS2:ETV5a/TMPRSS2:ETV5b* gene fusions under ADC. siRNA silencing of *TMPRSS2* and/or *ETV5* suggests that *TMPRSS2:ETV5* fusions facilitates the E<sub>2</sub>-ER $\beta$  induced growth and migration effects via NF- $\kappa$ B-dependent induction of cyclin D1 and MMP2 and MMP9 in PC-3 cells. Collectively, our results unravel the functional significance of oncogenic *TMPRSS2:ETV5* fusions in mediating growth and migration of E<sub>2</sub>-ER $\beta$ 2 signaling axis in CRPC cells. E<sub>2</sub>-ER $\beta$ 2 signaling axis may have significant therapeutic and prognostic implications in patients with CRPC.**

### INTRODUCTION

Prostate cancer (PC) is the most common form and the second leading cause of cancer-related death among American males [1]. The American Cancer Society estimated 200,800 new cases of PC with an anticipated death rate of 27,540 among American males in 2015 [1]. Despite an initial 12–18 months of regression in response to hormone ablation therapy [2], patients frequently present with relapse of a more aggressive castration-resistant PC (CRPC) [3]. However, the current treatment options are limited because the underlying mechanisms that govern the stepwise transition to CRPC remain elusive.

Estrogen (E<sub>2</sub>) regulates cellular physiology *via* activation of estrogen receptors (ERs) through canonical and non-canonical signaling pathways [4]. In the classical pathway, E<sub>2</sub> diffuses through the plasma membrane, binds to ERs in the cytoplasm, the ligand-bound ER dimers then

translocate to the nucleus and bind estrogen-responsive elements (EREs) on target genes, regulating their signaling. We have reported earlier that E<sub>2</sub> elicits cell surface activation of ER signaling via a variety of signal transduction pathways [5]. Also, our recent demonstration of a correlation between ER $\beta$  expression in prostate tumors and disease progression suggests a potential involvement of ER $\beta$  in the development of late-stage PC, especially among African American men [6]. In addition, preclinical studies have shown the use of selective estrogen receptor modulators (SERMs) for the prevention and treatment of CRPC [7] and Nakajima *et al.* have reported that E<sub>2</sub> antagonists may abrogate ER $\beta$ - and KLF5-mediated signaling, and promote cellular proliferation [8]. However, the mechanisms by which ER $\beta$  primes PC progression are not fully elucidated.

Prostate cancer is marked with recurrent gene fusions, including *TMPRSS2* and E26 transformation-specific (*ETS*) transcription factors [9]. All *ETS* members

share significant sequence homology encompassing 85 amino acids in the C-terminal *ETS* domain and a DNA binding 5'-GGA(A/T)-3' motif [9]. Gene fusion of the 5'-untranslational region of *TMPRSS2* with *v-ETS*, avian erythroblastosis virus E26, oncogene homolog (*ERG*), has been widely reported in PC [9]. In addition to its commonly known fusion with the *ERG* gene, *TMPRSS2* also fuses with other members of the *ETS* family, such as *ETV1* (also named *ER81* for *ETS-related 81*), *ETV4* (*ETS variant 4*), and *ETV5* (*ERM* for *ETS-related molecule*), in approximately 10% of PCs [10]. The *TMPRSS2:ETS* gene fusions have been shown to play an important role in cellular proliferation [11], migration, and invasion [7]. However, the oncogenic mechanisms of *TMPRSS2:ETV5* gene fusion and their related signaling are still under study.

Evidence from expression profiles in PC cohorts shows an association between *TMPRSS2* gene fusions and estrogen receptor (ER) signaling [12]. However, the mechanisms by which *TMPRSS2* is regulated by estrogen are not delineated. Here we have investigated the molecular mechanisms that underlie the expression of *TMPRSS2* gene and its fusion forms through non-canonical ( $E_2$ -ER $\beta$ -Src-IGF-1R) pathway in androgen receptor (AR)-null PC-3 cells.

## RESULTS

### Estradiol stimulates growth of ER $\beta$ -expressing AR-null PC-3 cells

We examined the constitutive expression of AR and ER $\beta$  transcripts and protein levels in normal human primary prostate epithelial cells (PrEC) and a panel of PC cell lines, LNCaP, C4-2B, and PC-3 cells, by qRT-PCR using "pan" PCR primer set. Figure 1A (upper panel) depicts that the constitutive expression of all ER $\beta$  transcript levels in the AR-null PC-3 cells are at least 10-fold higher compared to the AR-expressing LNCaP and its isogenic metastatic castration-resistant C4-2B cells. However, C4-2B cells have twice as high endogenous ER $\beta$  transcripts compared with its parental LNCaP androgen-dependent cells. The expression of endogenous ER $\beta$  and ER $\alpha$  levels in these cell lines were corroborated by immunoblot analysis using pan anti-ER $\beta$  antibody (Figure 1A; lower panel). In comparison to PC cells, the protein expression levels of AR and ER $\beta$  were very low or undetectable in PrEC cells. The 17 $\beta$ -estradiol ( $E_2$ ) stimulated growth of AR-negative PC-3 cells under hormone-deprivation conditions (HDC) (Figure 1B). The selective  $E_2$  growth stimulatory effect was abrogated by 4-hydroxytamoxifen (4-OHT), a selective estrogen receptor modulator (SERM) or ICI 182,780 (Fulvestrant<sup>®</sup>), an ER antagonist, as measured by cell counting assay kit-8. In contrast, while moderate effect was observed in the CRPC AR-expressing C4-2B,  $E_2$  triggered no effect on growth in LNCaP cells (*data not shown*).

The role of estrogens in androgen independence has been suggested by the observation that both primary and metastatic PC expresses the ER $\beta$  subtypes [13]. Based on our qRT-PCR analysis, constitutive expression of ER $\beta$ 2 is 3-fold higher in PC-3 than DU-145 and normal prostate epithelial cells (PrEC) (Supplementary Figure S1A). The finding was corroborated by Western blot analysis (Supplementary Figure S1B). Notably,  $E_2$  did not elicit growth stimulatory effect in DU-145 cells, suggesting that ER $\beta$ 2, but not ER $\beta$ 1, is critical to  $E_2$ -induced mitogenic response in PC-3 cells (Supplementary Figure S1C).

### IGF-1R is required for non-canonical $E_2$ -ER $\beta$ induced proliferation of PC-3 cells

Because of its potential role in PC progression, we investigated if the expression of IGF-1R is modulated in  $E_2$ -treated PC-3 cells. Our qRT-PCR analysis revealed that  $E_2$  induces time-dependent transcription of IGF-1R mRNA above the threshold level. The  $E_2$ -induced IGF-1R protein levels reached their maximum levels at 12 h and sustained for at least 48 h after treatment (Figure 1C). A critical outcome of activation of IGF-1R signaling is promotion of cell growth. To this end, we examined if siRNA-mediated silencing of IGF-1R modulates the  $E_2$  and/or IGF-I induced proliferative responses in PC-3 cells. The siRNA knockdown of IGF-1R resulted in discernible inhibition of  $E_2$  or IGF-I induced cell proliferation in comparison to vehicle-treated controls or control siRNA transfected cells (Figure 1D). Next, we employed both unconjugated  $E_2$  and the extracellular non-diffusible fluorescein-labeled  $E_2$ -BSA ( $E_2$ -BSA-FITC) form, capable of preferential binding to ER on plasma membranes, to determine if  $E_2$  induction of IGF-1R expression and mitogenic response is mediated via genomic or non-canonical pathways. Like  $E_2$ ,  $E_2$ -BSA-FITC stimulated growth in PC-3 cells under hormone-deprivation condition (HDC), implicating that ER $\beta$ 2 may trigger PC-3 cell proliferation via a non-classical pathway (Figure 1E). The growth inhibition by the IGF-1R selective inhibitor (AG1024) in PC-3 cells treated with  $E_2$  or  $E_2$ -BSA-FITC (Figure 1E) corroborates this notion and further suggests that the non-classical activation of IGF-1R by  $E_2$  may be pivotal to initiation of mitogenic signaling in these cells. These findings were further validated by confocal immunofluorescence studies to examine if ER $\beta$ 2 co-localizes with IGF-1R on the plasma membrane within hormone stimulated PC-3 cells. Under non-permeabilized conditions, IGF-1R (red) co-localized with ER $\beta$  (blue) on the plasma membrane in PC-3 cells pre-stimulated with  $E_2$ -BSA-FITC (green) compared with untreated cells (0 min) (Figure 1F). Similar results were observed upon replacing secondary antibodies for ER $\beta$ 2 and IGF-1R or when pan anti-ER $\beta$  antibody was employed (Supplementary Figure S2A and S2B, respectively). In contrast, ER $\beta$  nuclear localization

was observed with pan anti-ER $\beta$  antibody in E $_2$ -stimulated PC-3 cells under plasma membrane permeabilization conditions (Supplementary Figure S2C). Collectively, the results suggest that IGF-1R is required for proliferative response mediated by E $_2$ -ER $\beta$  axis in PC-3 cells.

### **E $_2$ -ER $\beta$ signaling axis primes expression and phosphorylation of IGF-1R and NF- $\kappa$ B through activation of Src (p $^{418}$ Src) in PC-3 cells**

Since Src tyrosine kinase (Src) is implicated in the development of cancer metastasis, we sought to examine its recruitment and interaction with ER $\beta$ 2 and/or IGF-1R on plasma membrane in E $_2$ -stimulated PC-3 cells. Figure 2A depicts an interaction between c-Src (total), ER $\beta$  (pan-antibody) and IGF-1R (total) when measured by co-immunoprecipitation assays in PC-3 cells treated with E $_2$  (upper panel) or E $_2$ -BSA-FITC (lower panels) compared to vehicle-treated cells and control IgG. Next, we assessed whether E $_2$ -ER $\beta$  axis not only confers interaction but also activates IGF-1R and Src in PC-3 cells. As shown in Figure 2B, E $_2$  selectively induces phosphorylation of Src (p $^{418}$ Src) in PC-3 cells within 5 min. The activation of Src is nullified by the ER antagonist ICI 182,780, suggesting a direct role for E $_2$ -ER $\beta$  axis in activation of Src. The reversal of Src activation by the selective inhibitor PP2 shows its activation is required for E $_2$ -induced IGF-1R phosphorylation, which was comparable in effect to the AG1024-mediated inhibition of Src phosphorylation (Figure 2B). In addition, the activation of Src appears to be required for E $_2$ -mediated activation of NF- $\kappa$ B, as evidenced in PP2-treated PC-3 cells (Figure 2C). Taken together, the results suggest that E $_2$  binding to ER $\beta$ 2 triggers recruitment and activation of c-Src, which in turn interacts with ER $\beta$ 2 and activates IGF-1R and NF- $\kappa$ B in PC-3 cells under HDC. Supplementary Figure S6A–S6E provide full blots for the Western and immunoprecipitation analyses.

### **Activation of E $_2$ -ER $\beta$ 2 signaling triggers NF- $\kappa$ B-dependent expression of *TMPRSS2*, *ETVs* and *TMPRSS2:ETV5* gene fusions in PC-3 cells**

Next, we examined if E $_2$  growth stimulation of ER $\beta$ 2-expressing PC-3 cells is associated with upregulation of androgen-regulated genes. As evidenced by selective inhibitors, E $_2$  induced *TMPRSS2* gene expression (Figure 2D, left panel) following induction of NF- $\kappa$ B activation (Figure 2D, right panel) in PC-3 cells. As shown in Figure 2E, *TMPRSS2* gene expression increased within 24 h upon stimulation of the androgen-dependent LNCaP cells with DHT, but not with E $_2$ . In contrast, *TMPRSS* transcript levels increased in response to DHT (~6-fold) or E $_2$  (~4-fold) in its isogenic CRPC (C4-2B) cells maintained under HDC, compared to vehicle-treated cells when measured by quantitative RT-PCR (Figure 2F; upper

panel) and Western blot (Figure 2F; lower panel) analyses. In PC-3 cells, E $_2$ , but not DHT, increased *TMPRSS2* transcripts (Figure 2G; upper panel) and protein (Figure 2G; lower panel). Time-course experiments showed that E $_2$  induces *TMPRSS2* gene expression in PC-3 cells in a time-dependent manner, which peaked (4-fold) at 12 h and sustained for 48 h (Figure 3A). The results were corroborated by conventional PCR (Figure 3B, upper panel) and immunoblot (Figure 3B, lower panel) analyses. siRNA silencing of ER $\alpha$  E $_2$  did not inhibit the E $_2$ -mediated induction of *TMPRSS2* protein expression in PC-3 cells (Supplementary Figure S3), thus further corroborating the direct role for E $_2$ -ER $\beta$ 2 axis in regulating expression of *TMPRSS2* in this cell line.

A unique fusion between the prostate-specific, 5'-untranslational region of *TMPRSS2* and the *ETS* family *ERG*, *ETV1*, *ETV4*, or *ETV5* has been described in PC [10]. Given that the cellular signaling mechanisms of the *TMPRSS2* fusions and its associated partners in PC cells are not fully understood, we sought to investigate their expression and mechanistic roles in the E $_2$  growth stimulatory response in PC-3 cells. Besides *TMPRSS2*, E $_2$  triggered transcriptional upregulation of *ETV5* (~9-fold), *ETV1* (~4-fold) and *ETV4* (~4-fold) within 12 h in PC-3 cells (Figure 3C). Notably, the basal mRNA levels of *ERG* did not change in response to E $_2$  (Figure 3C). Importantly, the transcriptional upregulation of *TMPRSS2* and *ETV5* was coupled with upregulation of *TMPRSS2:ETV5b* and, to a lesser extent, of *TMPRSS2:ETV5a* fusion transcripts in E $_2$ -treated PC-3 cells (Figure 3D). To confirm transcriptional upregulation of *TMPRSS2* gene fusions, we conducted qRT-PCR analysis of *TMPRSS2*, *ETV5* or *TMPRSS2:ETV5* fusion transcripts in E $_2$ -stimulated PC-3s transfected with *TMPRSS2* and/or *ETV5* siRNAs. As shown in Figure 3E, siRNA knockdown of *TMPRSS2* and/or *ETV5* not only decreased their individual transcripts, but also *TMPRSS2:ETV5* gene fusions, suggesting that gene fusions are predominantly induced in E $_2$ -stimulated PC-3 cells. The marked suppression of *TMPRSS2* transcription by 4-OHT and ICI 182,780 attests to the selective induction of *TMPRSS2* and *ETVs* and their gene fusions by E $_2$  in PC-3 cells (Figure 3F). The E $_2$ -mediated induction of *TMPRSS2* and ER $\beta$ 2 protein levels was inhibited in ER $\beta$  shRNA-silenced PC-3 cells, thus further supporting a direct role for E $_2$ -ER $\beta$ 2 axis in regulating transcription of *TMPRSS2* and its *ETV5* fusions in this cell line (Figure 4A).

### **Src-mediated activation of IGF-1R, but not GPER1, is required for E $_2$ -ER $\beta$ 2 induced transcriptional upregulation of *TMPRSS2* gene fusions in PC-3 cells**

We examined if induction of *TMPRSS2* by E $_2$ -ER $\beta$ 2 axis is mediated through Src-activated IGF-1R or G protein-coupled estrogen receptor-1 (GPER-1), an integral plasma membrane protein with high affinity for

$E_2$  As shown in Figure 4B, both  $E_2$  and  $E_2$ -BSA-FITC are comparable in their ability to induce *TMPRSS2* gene expression in PC-3 cells. In contrast, treatment of PC-3 cells with various concentrations of the *GPER-1* agonist (G-

1) did not induce *TMPRSS2* gene expression (Figure 4B) or protein levels (Supplementary Figure S4), suggesting that alternative pathways are involved. Notably, *TMPRSS2* protein levels were significantly suppressed in IGF-1R

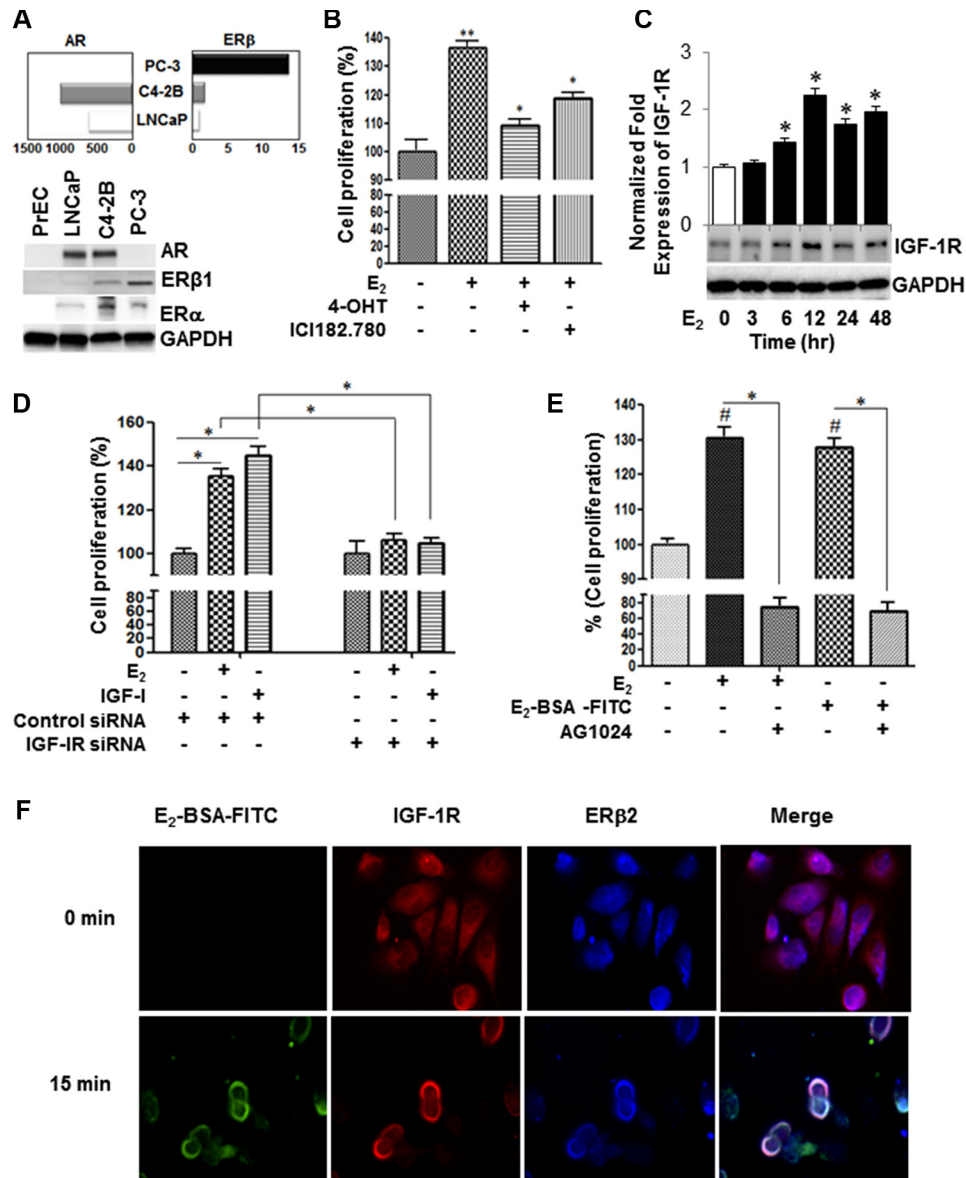

**Figure 1: Estrogen induces IGF-1R-dependent cell proliferation through non-canonical activation of ERβ2 in AR-null PC-3 cells.** (A) qRT-PCR and Western blot analyses of AR, ER-β and GAPDH in a panel of PC cell lines. The PC cells were maintained for 48 hours in 10% CS-FBS. Then, the target genes and protein levels were measured by qRT-PCR (upper panel), and Western blot analyses (lower three panels), respectively, in PrEC, LNCaP, C4-2b, or PC-3 cells as described in the Methods section. (B) 4-hydroxtamoxifen (4-OHT), a selective estrogen receptor modulator, or ICI182.780 (antiestrogen) inhibited  $E_2$  mediated growth stimulatory effects in PC-3 cells. PC-3 cells ( $5 \times 10^3$  cells per well) were incubated with vehicle or 1  $\mu$ M inhibitor for 48 h. Cell growth was measured by cell counting kit-8 (CCK-8). (C) Time-course analysis of IGF-1R protein expression in  $E_2$ -stimulated PC-3 cells. (D) PC-3 cells were transiently transfected with *IGF-1R* siRNA or non-targeting control siRNA, after which cells were treated with vehicle, 10 nM  $E_2$  or 50 ng IGF-1 for 48 h and cell proliferation was assessed by CCK-8. (E) Selective IGF-1R inhibitor (AG1024; 5  $\mu$ M) attenuated growth stimulatory effects treated with  $E_2$  or  $E_2$ -BSA-FITC in PC-3 cells for 48 hours. (F) PC-3 cells cultured in chamber slides were stimulated with  $E_2$ -BSA-FITC and then fixed under non-permeabilization conditions, and subjected to immunofluorescence staining with antibodies against ERβ2 and IGF-1R. The  $E_2$ -BSA-FITC (green) stimulation triggered co-localization of IGF-1R (red) and ERβ2 (blue) on the plasma membrane of PC-3 cells. The upper right panel shows that permeabilization is required to detect ERβ in the nucleus. The lower panel shows that under permeabilized conditions, IGF-1R (green) co-localizes with ERβ2 (red) in PC-3 cells. DAPI is indicated in blue. The images were captured using Leica fluorescence microscope. Bar graphs represent mean  $\pm$  SEM values in triplicates. \* and \*\* denotes significance at  $P < 0.05$  and  $P < 0.01$ , respectively, compared to vehicle-treated cells ( $n = 3$ ).

siRNA- silenced PC-3 cells treated with E<sub>2</sub>, indicating that Src-activated IGF-1R is involved in TMPRSS2 protein expression in E<sub>2</sub> stimulated cells (Figure 4C). This finding was further strengthened by the

fact that an IGF-1R selective inhibitor, AG1024, significantly blocked E<sub>2</sub>-induced TMPRSS2 protein expression (Figure 4D). The E<sub>2</sub>-induced *TMPRSS2* gene expression through activation of IGF-1R

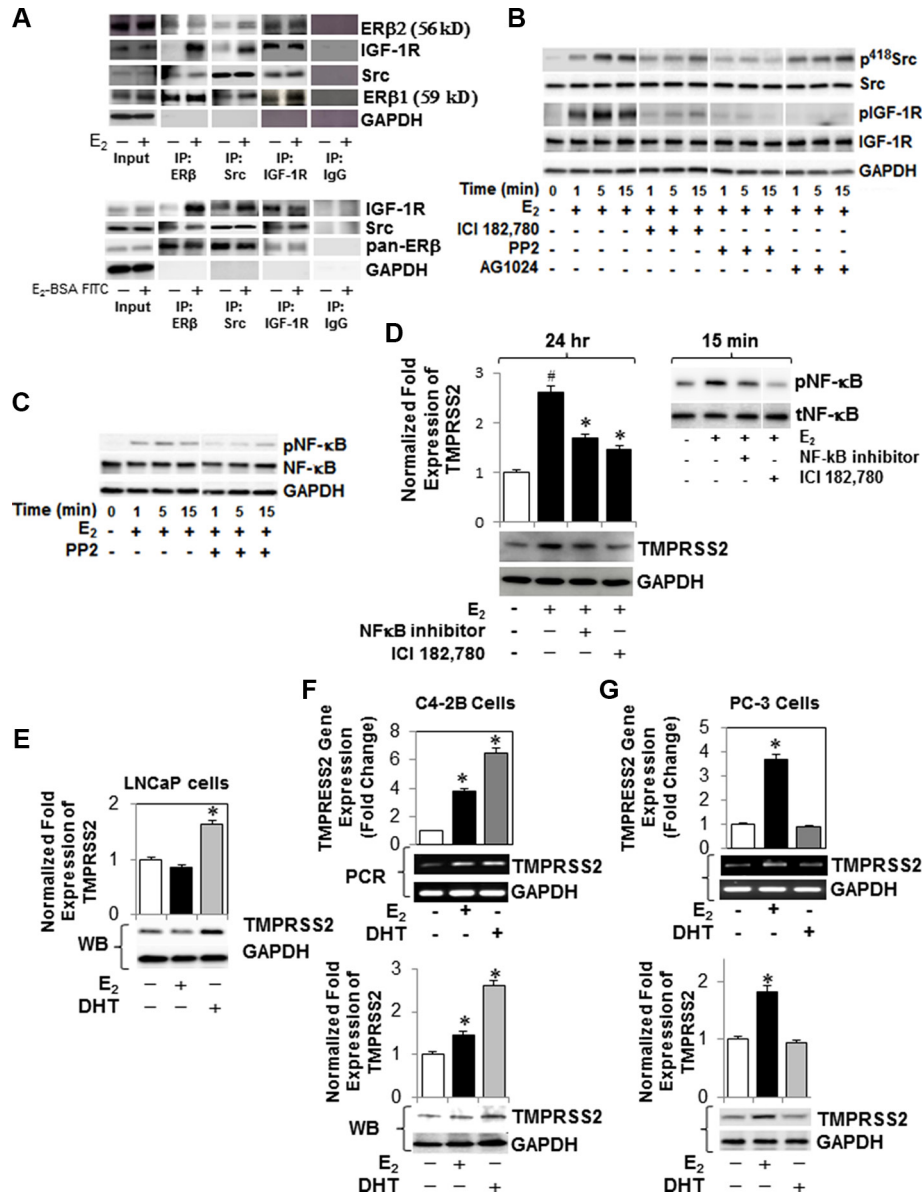

**Figure 2: E<sub>2</sub>-ERβ2 signaling axis primes Src (p<sup>418</sup>Src)-dependent activation of IGF-1R and NF-κB and expression of TMPRSS2 in PC-3 cells.** (A) PC-3 cells were treated with vehicle, 10 nM E<sub>2</sub> (upper panel) or E<sub>2</sub>-BSA-FITC (bottom panel) for 5 min, after which protein extracts were subjected to immunoprecipitation with antibodies against c-Src, IGF-1R, ERβ or IgG control. The immunoprecipitates and 10% input were subjected to immunoblot analysis with antibodies against c-Src, ERβ1 (59 kD), ERβ2 (56 kD), IGF-1R, or GAPDH. For controls, lysates were immunoprecipitated with control IgG followed by immunoblot analysis. (B) PC-3 cells treated with E<sub>2</sub> (10 nM) in the presence of PP2 (selective Src inhibitor), ICI 182,780 or AG1024 were harvested at different time intervals as indicated. Protein lysates were subjected to immunoblot analysis with antibodies against phospho-IGF-1R (p-IGF-1R), IGF-1R, phospho-Src (p<sup>416</sup>Src), Src, or GAPDH. (C) Protein lysates of PC-3 cells treated 10 nM E<sub>2</sub> at different time intervals, in the presence or absence of PP2, were examined for expression of phospho-NF-κB (pNF-κB), NF-κB, or GAPDH by immunoblot analysis. (D) Western blot analysis of TMPRSS2 expression in PC-3 cells treated with E<sub>2</sub> (10 nM) in the presence or absence of ICI 182,780 (1 μM) or NF-κB activation inhibitor II for 24 hours. Protein extracts with E<sub>2</sub> (10 nM) for 15 min were prepared and subjected to immunoblot analysis with antibodies against pNF-κB or tNF-κB (inset). (E) AR-expressing LNCaP cells were treated with E<sub>2</sub> (10 nM) or DHT (10 nM) for 24 hours and TMPRSS2 protein levels were measured by immunoblot analysis against GAPDH. (F, G) C4-2B and PC-3 cells, respectively, were treated with E<sub>2</sub> (10 nM) or DHT (10 nM) for 12 hours. Cell lysates were analyzed for *TMPRSS2* gene expression by qRT-PCR (upper panel) and conventional RT-PCR (middle panel) and protein level by immunoblot analysis against GAPDH. Bar graphs represent mean ± SEM values in triplicates. \* denotes significance at *p* < 0.01 compared to controls (*n* = 3).

prompted us to examine its transcriptional regulatory effect upon canonical activation by IGF-I or IGF-II in PC-3 cells. Stimulation of PC-3 cells with IGF-1 had no effect on *TMPRSS2* basal transcript and protein levels, as evidenced by qRT-PCR (Figure 4E) and immunoblot (Figure 4F) analyses. Conversely, an increase in *TMPRSS2* protein levels was noted in IGF-II-treated PC-3 cells (Figure 4F). Importantly, transcriptional

upregulation of *TMPRSS2*, *ETV5* and *TMPRSS2:ETVa/b* gene fusions were detected in IGF-II-treated PC-3 cells (Supplementary Figure S5), suggesting that IGF-II may trigger growth stimulation in PC-3 cells in a *TMPRSS2*-dependent mechanism. Together, the results implicate non-canonical Src-mediated activation of IGF-1R in the  $E_2$ -induced expression of *TMPRSS2* and its *ETV* gene fusions in PC-3 cells.

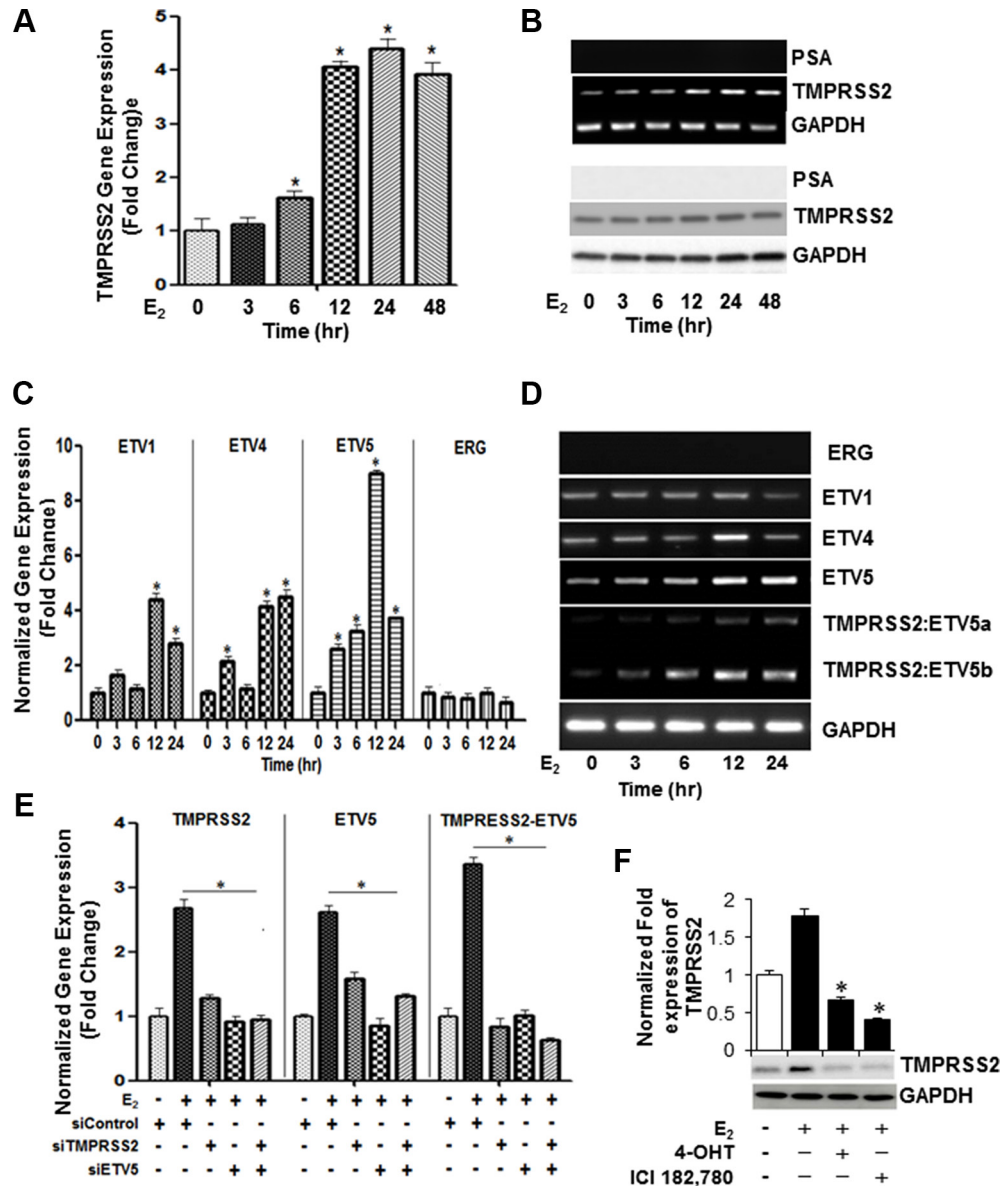

**Figure 3: Selective expression of *ETV4*, *ETV5*, *TMPRSS2:ETV5a* and *TMPRSS2:ETV5b* transcripts in  $E_2$ -stimulated PC-3 cells.** (A, B)  $E_2$ -mediated transcriptional upregulation of *TMPRSS2* peaks at 12 hours. PC-3 cells were treated with  $E_2$  (10 nM) at indicated time intervals and cell lysates were examined for *TMPRSS2*, *PSA* and *GAPDH* mRNA expression by qRT-PCR (A) and conventional RT-PCR (B; upper three panels) and their protein expression by Western blot analysis (B; lower three panels). (C) Gene expression of *ETV1*, *ETV4*, *ETV5* and *ERG* in PC-3 cells treated with  $E_2$  (10 nM) for different time intervals were analyzed by qRT-PCR. *GAPDH* was used as an internal control for normalization of expression values. (D) PCR analysis reveals selective upregulation of *ETV4*, *ETV5*, *TMPRSS2:ETV5a* and *TMPRSS2:ETV5b* transcripts in PC-3 cells 12 hours following stimulation with 10 nM  $E_2$ . (E) PC-3 cells were subjected to siRNA knockdown of *TMPRSS2*, *ETV5* or both genes after which the cells were treated with 10 nM  $E_2$  for 12 hours and gene expression was assessed by qRT-PCR. Data was normalized to *GAPDH*. (F) *TMPRSS2* and *GAPDH* protein levels were measured by immunoblot analysis in PC-3 cells treated with 10 nM  $E_2$  in the presence or absence of ICI 182,780, or 4-OHT for 24 hours. Bar graphs represent mean  $\pm$  SEM values in triplicates. \* denotes significant difference compared to controls at  $p < 0.05$  ( $n = 3$ ).

## ***ETV5* and *TMPRSS2-ETV5* gene fusions prime $E_2$ -ER $\beta$ -mediated growth and migration of PC-3 cells through NF- $\kappa$ B-dependent expression of cyclin D1 and MMPs in CRPC cells**

Next, we investigated if *TMPRSS2*, *ETV5*, or *TMPRSS2-ETV5* gene fusions are involved in  $E_2$ -ER $\beta$  axis induction of mitogenic response and migration of PC-3 cells. As shown in Figure 4G, siRNA silencing of *TMPRSS2* and/or *ETV5* significantly inhibited  $E_2$  induced PC-3 cell proliferation at 24 h and 48 h compared to vehicle-treated or control siRNA transfected cells. Likewise, silencing of *TMPRSS2* and/or *ETV5* genes suppressed the ability of  $E_2$ -stimulated PC-3 cells to form colonies, further attesting to the potential involvement of *ETV5* and *TMPRSS2-ETV5* fusions in  $E_2$ -ER $\beta$  mediated PC-3 cell growth (Figure 4H). Next, we examined if cyclin D1 is a direct transcriptional target for *ETV5* and *TMPRSS2-ETV5* gene fusions in PC-3 cells. Figure 5A and 5B show siRNA silencing of *TMPRSS2* and/or *ETV5* genes primed down-regulation of  $E_2$ -ER $\beta$  induced cyclin D1 gene (upper panels) and protein levels (lower panels), thus reinforcing the potential role of cyclin D1 in mediating *ETV5* and/or *TMPRSS2-ETV5* gene mitogenic response of  $E_2$  in PC-3 cells. Moreover, we used Boyden chamber assays to examine the effect of *ETV5* and *TMPRSS2-ETV5* gene fusions on invasion and migration of PC-3 cells. The number of migrated (Figure 5C) and invaded (Figure 5D and 5E) PC-3 cells were significantly reduced in *TMPRSS2* siRNA-transfected  $E_2$ -treated PC-3 cells, potentially through down-regulation of MMP2 and MMP9 (Figure 5F). Since NF- $\kappa$ B is implicated in their regulation, we examined if it plays a pivotal role in mediating the expression of MMPs by *TMPRSS2* and *TMPRSS2* gene fusions in the  $E_2$ -stimulated PC-3 cells. Figure 5G shows that  $E_2$  activates NF- $\kappa$ B within 15 min in PC-3 cells, and that *TMPRSS2* is required for its activation. The results not only implicate a positive activation loop between these factors, but also the potential involvement of NF- $\kappa$ B in *TMPRSS2*-mediated MMP gene expression in  $E_2$ -treated PC-3 cells. Together, the results suggest *TMPRSS2* is a critical player in promoting  $E_2$ -mediated stimulation of growth and migration of PC-3 cells, primarily through NF- $\kappa$ B activation.

## **DISCUSSION**

Understanding the underlying molecular pathways that lead to the development of CRPC may establish a more rational approach for development of new therapeutic strategies. Despite the historical use of estrogen in the treatment of PC, little is known about its direct role in prostate tumorigenesis. This is particularly important since circulating estrogen-to-androgen ratio increases with age [14], a risk factor for PC development and progression. In addition, intracrine estrogen synthesis and metabolism in

the tumor microenvironment have been implicated as the driving force of PC outgrowth following androgen ablative therapy [15]. This notion was strengthened by the fact that the level of aromatase expression (CYP19A1), the enzyme that catalyzes conversion of testosterone into estradiol, is elevated by 30-fold in metastatic sites compared with primary prostate tumors [16], suggesting that estradiol may contribute to disease progression. To our knowledge, the present study provides the first molecular link between  $E_2$  and CRPC cell growth *in vitro*.

The functional significance of ER $\beta$  in prostate tumorigenesis remains a matter of conjecture. Unlike ER $\alpha$ , epidemiological and tissue expression profile studies demonstrated the anti-oncogenic and protective roles ER $\beta$  play in the prostate [17]. In contrast, recent evidence revealed that activation of ER $\beta$  by genistein promotes, and inhibition of ER $\beta$  by ICI 182, 780 suppresses metastatic PC progression in a xenograft model system [18]. We have recently demonstrated selective expression of ER $\beta$  in patients with advanced PC [6]. Nuclear ER $\beta$  expression was detected with varying degree in 100% of osseous and non-osseous metastatic PC samples, suggesting it plays a role in disease progression [6, 19]. However, the underlying mechanisms by which ER $\beta$  splice variants promote disease progression remain elusive, especially under hormone deprivation conditions. The selective growth stimulation by  $E_2$  in PC-3 cells, but not DU-145 cells implicates ER $\beta_2$ , but not ER $\beta_1$ , in  $E_2$  induced mitogenic response in this cell line. The co-localization of ER $\beta_2$  with IGR-1R and its co-precipitation with IGR-1R and Src further corroborate its crucial role in priming proliferative and migratory responses via Src-IGF-1R axis in PC-3 cells. Consistent with our findings, ER-expressing undifferentiated prostaspheres have been shown to exhibit proliferative response to  $E_2$  [20]. High constitutive expression of ER $\beta$  subtype compared to ER $\alpha$  in CRPC cells, such as PC-3 and C4-2B, may explain activation and a potential contributory role of  $E_2$ -ER $\beta$  signaling axis in growth and clonal expansion of these cells. Our findings suggest that a subset of ER $\beta$ -expressing PC cells may be direct estrogen targets in patients following androgen ablation therapy. Whether this effect is mediated by circulating or residual estrogens certainly warrants further investigation.

*TMPRSS2*, a type II transmembrane member of the serine protease family, is implicated in PC progression [9] by modulating the vascular function and angiogenesis [21]. However, the regulatory mechanisms involved in expression of *TMPRSS2* fusions in PC cells remain largely unknown. We report herein, for the first time, that *TMPRSS2* is expressed in response to  $E_2$  in both AR-expressing and AR-null CRPC cells under ADC. The  $E_2$ -induced expression of *TMPRSS2* mediates PC-3 cell growth through non-canonical activation of ER $\beta$  under ADC. We have shown that IGF-1R inhibition blocked the expression of *TMPRSS2* in  $E_2$ -stimulated PC-3 cells by AG1024 (IGF-1R inhibitor). Additionally, silencing

IGF-1R in PC-3 cells decreased *TPMRSS2* expression and inhibited  $E_2$  or IGF-I mediated PC-3 cell proliferation. Dysregulation of various components of the IGF-1R system has been reported at different tumor stages and has been implicated in tumorigenesis through non-canonical

pathways [5]. Recent studies revealed molecular pathways by which IGF-II ignites the *de novo* steroidogenesis engine, confers androgen independent growth in PC cells [22], and promotes molecular events associated with PC progression to castration resistance [23, 24]. However, the underlying

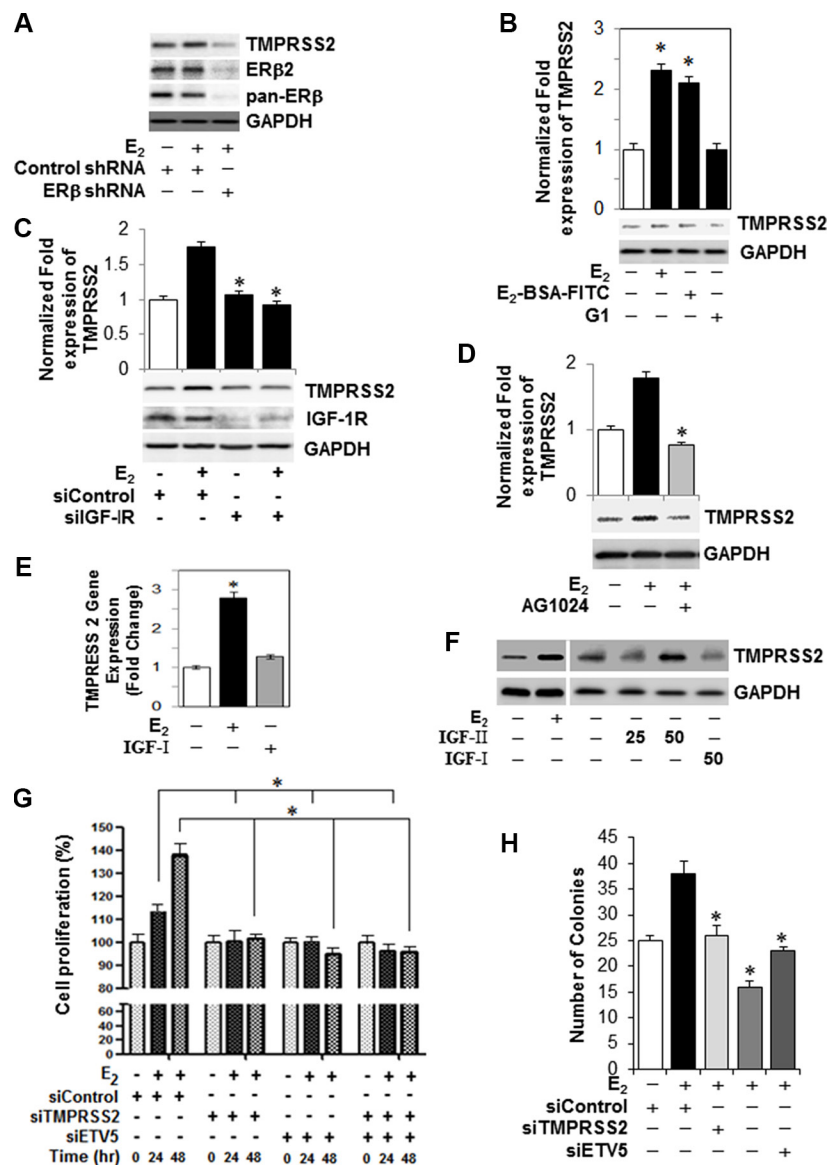

**Figure 4: *TPMRSS2*, *ETVs* and *TPMRSS2:ETV5* gene fusions are involved in an IGF-1R-dependent growth stimulatory effect of  $E_2$ -ERβ2 axis in PC-3 cells.** (A) PC-3 cells were subjected to ERβ knockdown with shRNA, and then treated with 10 nM  $E_2$  for 24 hours. Protein extracts were subjected to immunoblot analysis with antibodies against *TPMRSS2*, ERβ, ERβ2, or GAPDH. (B) PC-3 cells were incubated with 10 nM  $E_2$ , 10 nM  $E_2$ -BSA-FITC, or 10 nM of G-1, an agonist of the G protein-coupled estrogen receptor-1 (GPER-1) for 12 hours and *TPMRSS2* and *GAPDH* mRNAs and protein levels were quantified by qRT-PCR (upper panel) and immunoblot analysis (lower panel). (C) Protein levels of *TPMRSS2*, IGF-1R or GAPDH were measured by Western blot in PC-3 cells transiently transfected with siRNA targeting *IGF-1R* siRNA or non-targeting control siRNA and then treated vehicle or 10 nM  $E_2$  for 24 hours. (D) Assessment of *TPMRSS2* protein expression in PC-3 cells treated with 10 nM  $E_2$  in presence or absence of 5 μM of an IGF-1R inhibitor (AG1024). GAPDH protein expression was used as loading control. (E, F) *TPMRSS2* transcripts quantified by qRT-PCR (E) and protein levels (F) as measured by Western blot analysis relative to their respective controls in PC-3 cells treated with vehicle, 10 nM  $E_2$ , 25 ng and 50 ng IGF-I or 50 ng IGF-II for 24 hours. (G) PC-3 cells were transiently transfected with non-targeting control siRNA or siRNAs targeting *TPMRSS2*, *ETV5* or both and then treated with vehicle or 10 nM  $E_2$  for 0, 24 or 48 hr. Cell proliferation was assessed by Cell Counting Kit-8. Data represent Mean ± SEM in triplicates. (H) Colony formation assay by PC-3 cells transiently transfected with non-targeting control siRNA or siRNAs targeting *TPMRSS2*, *ETV5* or both and then treated with vehicle or 10 nM  $E_2$ . Bar graphs represent mean ± SEM values in triplicates. \* denotes significant difference compared to controls at  $P < 0.05$  ( $n = 3$ ).

mechanisms of IGF-II remain largely uncharacterized. Our study demonstrates that IGF-II, but not IGF-I, promotes *TMPRSS2* protein expression. The finding suggests that IGF-II may promote development and progression of PC through transcriptional upregulation of androgen-dependent genes, such as *TMPRSS2*. Therefore, the direct relationship between IGF-1R, c-Src and ER $\beta$ 2 is a novel observation and shows that activation of this complex is required for or E<sub>2</sub>-BSA-FITC or E<sub>2</sub> mediated-regulation of *TMPRSS2* in AR-null PC cells.

A complex array of chromosomal rearrangements causes the fusion of *TMPRSS2* to *ETV* genes, leading to the generation of a wide variety of C-terminally truncated *TMPRSS2* fused to N-terminally truncated *ERG/ETV*. In PC, *TMPRSS2* also exists as gene fusion with erythroblastosis virus E26 (ETS) gene family members. The ETS are oncogenic transcription factors encompassing highly conserved DNA binding and an N-terminal regulatory domains. In all cases, ETS factors are known to act as positive or negative regulators of the

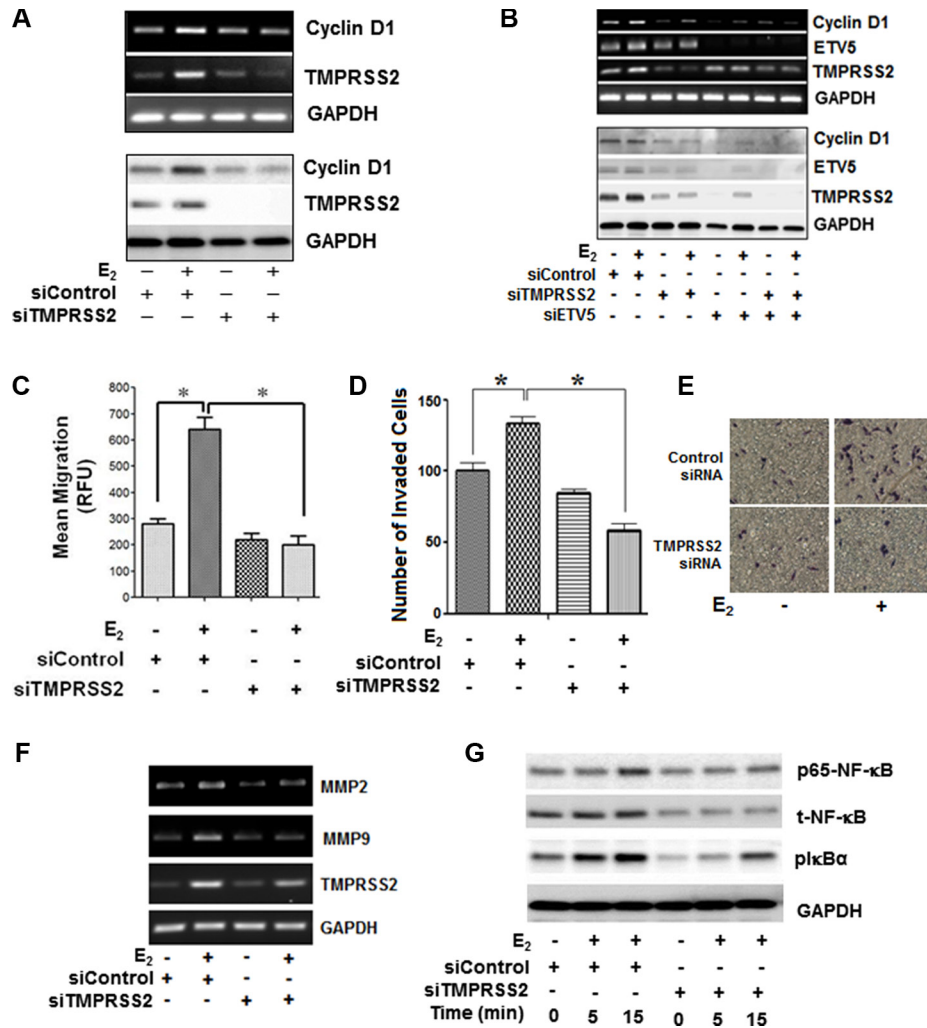

**Figure 5: *ETV5* and *TMPRSS2-ETV5* gene fusions prime E<sub>2</sub>-ER $\beta$ 2 mediated growth and migration of PC-3 cells through NF- $\kappa$ B dependent expression of cyclin D1 and MMPs in PC-3 cells.** (A) PC-3 cells were transiently transfected with siRNA targeting *TMPRSS2* or non-targeting control siRNA control, and then treated with vehicle or 10 nM E<sub>2</sub> for 12 or 24 hours. Transcripts and protein levels of cyclin D1, *TMPRSS2* and GAPDH were measured by RT-PCR (upper three panels) and immunoblot (lower three panels) analyses. (B) Transcript and protein levels *cyclin D1*, *TMPRSS2* and *ETV5* were examined by RT-PCR (upper three panels) and Western blot (lower three panels) in PC-3 cells transfected with siRNA targeting *TMPRSS2* or non-targeting control siRNA, and then treated with vehicle or 10 nM E<sub>2</sub> for 12 or 24 hours, respectively. A transwell migration assay was performed to assess the number of PC-3 cells migration. The cells were transiently transfected with siRNA targeting *TMPRSS2* or non-targeting control siRNA control and then treated with vehicle or E<sub>2</sub> (10 nM) and allowed to migrate to the bottom wells through a 4- $\mu$ m pore membranes for 24 hours. (C-E). Migrated cells were stained with Calcein-AM uptake (C) or Diff-Quick method (D) or methylene blue (E, F) *MMP2* and *MMP9* gene expression in PC-3 cells transiently transfected with siRNA targeting *TMPRSS2* or non-targeting control siRNA, and then treated with 10 nM E<sub>2</sub> or vehicle for 12 hours. (G) PC-3 cells transfected with siRNA targeting *TMPRSS2* or non-targeting control siRNA, and then treated with vehicle or 10 nM E<sub>2</sub> for 24 hours. Cell lysates were subjected for immunoblot analysis with antibodies against NF- $\kappa$ B, pNF- $\kappa$ B (p65), pI $\kappa$ B, or GAPDH. Bar graphs represent mean  $\pm$  SEM values in triplicates. \* denotes significant difference compared to controls at  $P < 0.05$  ( $n = 3$ ).

gene expression that are involved in various biological processes, including cellular proliferation, tissue remodeling, angiogenesis, transformation and metastasis [9]. *TMPRSS2* gene fusion with *ETV1*, *ETV4* or *ETV5* has also been documented in PC [25]. In the present study, the time-dependent transcriptional upregulation of *TMPRSS2* by  $E_2$  is concomitantly associated with expression of ETV family (*ETV1*, *ETV4* and *ETV5*) and *TMPRSS2:ETV5a* and *TMPRSS2:ETV5b* gene fusions in PC-3 cells, presumably through induced *TMPRSS2* expression. We also showed that *TMPRSS2* and *TMPRSS2:ETV5* fusions have growth-promoting activity and increase colony formation in the presence of  $E_2$  stimulation in the AR-null PC-3 cell lines. Conversely, *TMPRSS2:ETV5* knockdown suppressed cell proliferation and metastases as evidenced by decreased cyclin D1 and MMP expression, as well as a decrease in colony formation by  $E_2$  stimulation in PC-3 cells. The *ETV5* fuses with the 5' untranslated region of *TMPRSS2* in human PC tissue samples and induces cell invasion. The *TMPRSS2:ETV5a* transcript contained exon 1 of *TMPRSS2* fused to exon 2 of *ETV5* whereas *TMPRSS2:ETV5b* contained exons 1 to 3 of *TMPRSS2* fused to exon 2 of *ETV5* [26]. A recent study demonstrates that *TMPRSS2/ERG(T/E)* fusion gene can promote PC invasion and, to a lesser extent, proliferation and decrease differentiation via activation of c-myc, uPA, and MMPs, all of which have been previously implicated in PC initiation and progression [27]. Taken together, the results support the hypothesis that *TMPRSS2-ETV* fusions may be the driving force of the growth-promoting

ability of  $E_2$ -ER $\beta$  axis in CRPC cells, suggesting it may contribute to disease progression in PC patients through clonal expansion of castration-resistant phenotype. Thus, therapies targeted towards this axis may offer an attractive option for disease management in CRPC patients.

The transcriptional upregulation of *TMPRSS2-ETV5* fusions by  $E_2$  through ER $\beta$ -Src- IGF-1R complex was associated with NF- $\kappa$ B activation in PC-3 cells. The NF- $\kappa$ B pathway activation is associated with aggressive clinical behavior in PC. Both clinical and preclinical observations have shown that NF- $\kappa$ B plays an important role in PC growth, survival, metastatic progression, angiogenesis, and tumorigenesis. NF- $\kappa$ B transcriptional activity is increased by *TMPRSS2-ERG* fusions through toll-like receptors [28]. However, our results indicate that the upregulation of *TMPRSS2-ETV* gene fusion by  $E_2$  enhances the tumor-promoting activities of the NF- $\kappa$ B pathway through induction of growth and metastasis-related genes (cyclin D1 and MMPs). These findings provide further evidence of a relationship between  $E_2$ , ER $\beta$ , c-Src and IGF-1R in PC cells and delineate the molecular mechanisms that underlie expression of *TMPRSS2-ETV5* fusions in AR-null PC cells. Taken together, our findings strongly indicate that *TMPRSS2:ETV5* is not only an estrogen-responsive gene, but also a pivotal player in the outgrowth of castration-adapted PC cells under HDC. However, further investigations are required to decipher the underlying mechanisms by which *TMPRSS2* or *TMPRSS2:ETV5* fusion promotes growth, colony formation, and migration of  $E_2$ -stimulated AR-null CRPC cells.

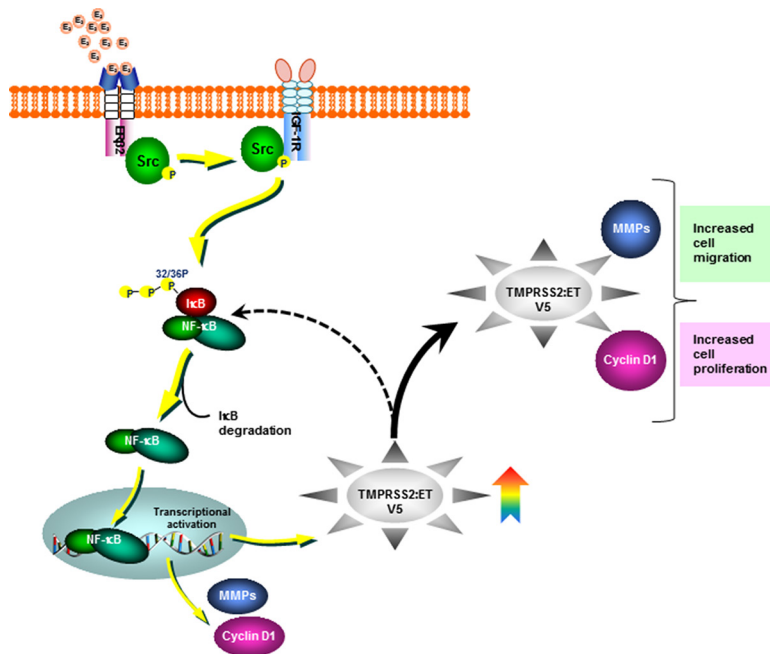

**Figure 6: Schematic representation depicting Src-IGF-1R dependent non-canonical activation of ER $\beta$ 2 by estradiol ( $E_2$ ).** The activation of  $E_2$ -ER $\beta$ 2 axis leads to expression of the androgen-dependent *TMPRSS2-ETV5a* and *b* gene fusions through IGF-1R dependent-activation of NF- $\kappa$ B in the CRPC AR-null PC-3 cells.

Collectively, our novel findings unravel the underlying mechanisms that govern the functional significance and the molecular link between the oncogenic axis of ER $\beta$ 2-IGF-1R-*TMPRSS2:ETV5* fusion in mediating E<sub>2</sub>-induced growth and migration of AR-null PC-3 cells (Figure 6). Selective targeting of such critical players may have significant preventive and therapeutic implications for CRPC.

## MATERIALS AND METHODS

### Reagents

Penicillin, streptomycin, charcoal-stripped fetal bovine serum (CS-FBS), and fetal bovine serum (FBS), were purchased from Invitrogen (Camarillo, CA, USA). The agonist G-1 of the G protein-coupled estrogen receptor-1 (GPER-1) and the ER antagonist ICI 182,780 were from TOCRIS (Bristol, UK); E<sub>2</sub>, 5 $\alpha$ -Dihydrotestosterone (DHT), or E<sub>2</sub>-BSA-FITC, 4-hydroxytamoxifen (4-OHT) were obtained from Sigma (St. Louis, MO, USA). The recombinant human IGF-I was from R&D Systems (Minneapolis, MN, USA) and the recombinant human IGF-II was from PerproTech (Rocky Hill, NJ, USA). The selective inhibitors of the Src family of protein tyrosine kinases (PP2) and IGF-1R (AG1024) were from EMD Millipore (Calbiochem, Temecula, CA). The NF- $\kappa$ B activation inhibitor II was purchased from EMD Millipore. Unless otherwise indicated, all other drugs were obtained from Sigma-Aldrich (St. Louis, MO, USA).

### Cell lines

Metastatic castration-resistant C4-2B (a kind gift from Dr. Leland Chung, Cedar-Sinai Medical Center, Los Angeles, CA), androgen-independent PC-3 prostate adenocarcinoma cell, and the human androgen-dependent prostate cancer LNCaP epithelial cells (ATCC, Manassas, VA USA), were cultured in RPMI1640 media supplemented with 10% fetal bovine serum, 2 mM L-glutamine and 1% penicillin/streptomycin (Invitrogen). The PrEC cells (ATCC) were maintained in prostate epithelial growth media (PrEBM) containing supplements and growth factors (BPE, hydrocortisone, hEGF, epinephrine, insulin, triiodothyronine, transferrin, gentamicin/amphotericin B, and retinoic acid) from Cambrex Bio Science (Walkersville, MD, USA). For routine maintenance, each cell line was grown as a monolayer at 37°C in a water-saturated atmosphere of 20% oxygen, 5% CO<sub>2</sub>. All cell lines were characterized and authenticated by the supplier (ATCC) using short tandem repeat (STR) profiling. Unless otherwise indicated, estradiol (E<sub>2</sub>) experiments were carried out in cells cultured in phenol-red free media supplemented with 10% charcoal-stripped FBS (Invitrogen). Supplementary Figure S7 provides the certificate of analysis for the authentication of PC-3 cells from ATCC.

### Transfection

Before treatment with E<sub>2</sub>, the medium was changed to RPMI supplemented with 10% CS-FBS. PC-3 cells were transiently transfected with control non-targeting siRNA or specific siRNAs targeting *TMPRSS2*, *IGF-1R*, or *ETVs* (Santa Cruz Biotechnology, CA, USA). In another set of experiments, PC-3 cells were transfected with a control shRNA plasmid, shRNA targeting *ER $\beta$*  or *ER $\alpha$*  using Lipofectamine 2000, according to the manufacturer's instructions (Invitrogen).

### Cell proliferation assay

The assay was performed as we described previously [5]. Briefly, cells were seeded in a 96-well plate and treated with vehicle (alcohol) or E<sub>2</sub> 10 nM in triplicates. After 24 or 48 hours of incubation, the medium was replaced with fresh medium containing 0.5 mg/ml MTT [3-(4,5-dimethylthiazol-2-yl)-2,5-diphenyltetrazolium bromide] or the Cell Counting Kit-8 (CCK-8; Donjindo Molecular Technologies, Rockville, Maryland, USA). After 4 hours, the supernatants were removed, and the resulting formazan crystals were measured spectrophotometrically using a microplate reader (Corning, NY, USA).

### Clonogenic survival assay

PC-3 cells were trypsinized and plated in triplicate into 60 mm at a density of 250 cells per well in 10 mm dishes. The cells were then transfected with control siRNA or siRNA targeting *TMPRSS2*, *ETV5* or both for 24 h and allowed to incubate for 12 days in growth media. The cells were washed and stained with crystal violet, and the colonies containing > 50 cells were counted. Plating efficiency was calculated by dividing the average number of cell colonies per well by the amount of cells plated. Survival fractions were calculated by normalization to the plating efficiency of appropriate control groups.

### PCR and immunoblot analyses

Oligonucleotide primers were synthesized by Integrated DNA Technologies and are listed in Table 1. RNA was subjected to conventional and quantitative RT-PCR analyses using selective primer sequences as we described previously [25]. The universal ER $\beta$  PCR amplicon set amplifies wild-type and all subtypes. Protein extracts were subjected to immunoblot analysis with antibodies to p-Src, c-Src (32G6), p-IGF-IR, IGF-IR, cyclin D1, p-p65 NF- $\kappa$ B, NF- $\kappa$ B, I $\kappa$ B, and p-I $\kappa$ B (Cell Signaling Technology); PSA, ETV5, or GAPDH (Santa Cruz Biotechnology); ER $\beta$ ; or *TMPRSS2* (Abcam, Cambridge, MA, USA). Immune complexes were detected with appropriate secondary antibodies and chemiluminescence reagents (Pierce Biotechnology, Rockford, IL, USA). Densitometry of immunoblot signals

**Table 1: Primer sequences used for RT-PCR**

| quantitative RT-PCR |                                       |                                  |
|---------------------|---------------------------------------|----------------------------------|
| Primer name         | Forward primer sequence               | Reverse primer sequence          |
| ETV1                | 5'-CCAAACTCAACTCATACACCGAAACC-3'      | 5'-GGAGGGAAGCTTTGGCTGGC-3'       |
| ETV4                | 5'-CCCTACCAACACCAGCTGTC-3'            | 5'-GAGAAGCCCTCTGTGTGGAG-3'       |
| ETV5                | 5'-CCACCTCCAACCAAGATCAAACG-3'         | 5'-CACCTTGAAGTGGCCAGCTG-3'       |
| TMRSS2              | 5'-GTCCCCACTGTCTACGAGGT-3'            | 5'-CAGACGACGGGGTTGGAAG-3'        |
| PSA                 | 5'-AGGCCTTCCCTGTACAC AA-3'            | 5'-GTCTTGGCCTGGTCATTTCC-3        |
| IGF-1R              | 5'-AGGAACAACGGGGAGAGAGC-3'            | 5'-ACC GGTGCCAGGTTATGATG-3'      |
| pan-AR              | 5-CCATCTTGTCTCTTCGGAAATGTTATG AAGC-3' | 5-AGCTTCTGGGTTGTCTCCTCAGTGG-3    |
| pan-ERβ             | 5'-AGAGTCCCTGGTGTGAAGCAA-3'           | 5'-GA AGCGCAGAAGTGAGCATC-3'      |
| TMRSS2:ETV5         | 5'-AGGCTTCCAACCCCGTCGTC-3'            | 5'-ACTTGCTGATCATAAAACCCGTCAT-3'  |
| MMP2                | 5'-TGATGGTGTCTGCTGGAAAG -3'           | 5'-GACACGTGAAAAGTGCCTTG-3'       |
| MMP9                | 5'-GGAGACCTGAGAACCAATCTC-3'           | 5'-TCCAATAGGTGATGTTGTGGT-3'      |
| GADPH               | 5'-TCCCTGAGCTGAACGGGAAG-3'            | 5'-GGAGGAGTGGGTGTCTGCTGT-3'      |
| RT-PCR              |                                       |                                  |
| Primer name         | Forward primer sequence               | Reverse primer sequence          |
| TMRSS2:ETV5a/b      | 5'-CGCGAGCTAAGCAGGAGGC-3'             | 5'- CCGTTTGATCTTGGTTGGAGGTG-3'   |
| ERβ2                | 5'-TCTCTCCAGCAGCAAT CC-3'             | 5'-GGT CAC TGC TCC ATC GTT GC-3' |

was quantified using the VersaDoc™ imaging system (Bio-Rad Laboratories, Hercules, CA, USA).

### Immunofluorescence

Cells were seeded on glass chamber slides and treated as described in the figure legends. Cells cultured on glass coverslips were washed twice with PBS, pH 7.2, and fixed under permeabilized [29] or non-permeabilized, PBS containing 2% PFA, 0.05% glutaraldehyde, and 120 mM sucrose [30], conditions for 30 min at room temperature. The non-permeabilized fixative conditions preserve plasma membrane integrity and prevent antibodies from binding to endogenous cellular targets. After fixation, cells were washed in PBS and incubated at room temperature with normal goat serum to block nonspecific binding. The coverslips were incubated overnight at 4°C with primary mouse anti-IGF-1R (clone GR11; EMD Millipore) or rabbit anti-ERβ (clone NBP1-40777, abcam, Cambridge, MA) antibody or ESR2 Beta-2 Antibody (cat# 55470-1-AP; Proteintech Group, Inc., Rosemont, IL), rinsed with PBS, and incubated with the appropriate fluorescently-labeled secondary antibodies, mouse Alexa 594 (red) or 350 (blue) or rabbit Ab Texas red (Red) or 350 (blue), and then examined under a Nikon fluorescence microscope.

### Co-immunoprecipitation

Protein-protein interaction between ERβ, Src and IGF-1R was determined using Pierce Classic Magnetic IP/Co-IP Kit according to manufacturer's protocol (Thermo Fisher Scientific

Inc, Rockford, IL, USA). Briefly, PC-3 cells cultured in CS-FBS-supplemented RPMI media were treated with vehicle or E<sub>2</sub> (10 nM) for 5 min. Cell extracts (500 μg) were lysed with an IP lysis/wash buffer containing 0.025 M Tris, 0.15 M NaCl, 0.001 M EDTA, 1% NP40, 5% glycerol, and protease inhibitor cocktail (Roche Applied Science, Indianapolis, IN, USA), and then incubated overnight at 4°C with 5 μg of either normal rabbit or mouse IgG (EMD Millipore), rabbit anti-ERβ mAb (#sc-8974; Santa Cruz Biotechnology, Inc.; Dallas, TX), mouse anti-c-Src (32G6) mAb (#2011; Cell Signaling Technology Inc.; Danvers, MA), or mouse anti-IGF-1R mAb (#sc-462; Santa Cruz Biotechnology, Inc.). Immune complexes were pulled down by protein A/G magnetic beads (0.25 mg) followed by low-pH elution. Eluted proteins were then boiled in SDS sample buffer and subsequently fractionated by SDS-PAGE. Following semi-dry transfer, the membranes were analyzed by immunoblotting using rabbit anti-ERβ (clone NBBP1-40777, Abcam), IGF-1R (sc-713; Santa Cruz Biotechnology, Inc.), c-Src (#2123S; Cell Signaling Technology, Inc.; Danvers, MA), rabbit anti-ERβ2 (Proteintech Group, Inc., Rosemont, IL), or GAPDH (Santa Cruz Biotechnology) antibodies at recommended dilutions. Immune complexes were detected with appropriate secondary antibodies and chemiluminescence reagents (Pierce Biotechnology). Densitometry of immunoblot signals was quantified as described above.

## Cell migration

Boyden chamber assay was carried out as we described previously [25]. PC-3 cells ( $1 \times 10^4$  cells/well) were transfected with non-targeting control or *TMPRSS2* siRNA for 24 h. Aliquots of cells were stained with Calcein-AM according to the manufacturer's protocol (Molecular Probes, Grand Island, NY). Stained and unstained cells ( $1 \times 10^4$  cells/well) were added to the upper chamber in serum-free medium and were monitored for 24 h for migration towards the lower chamber containing serum-free medium containing 10 nM  $E_2$ . The stained migrated cells were measured by a fluorescent plate reader (BioTek, Winooski, VT, USA) after 30 min. For the unstained cells, the non-migrated cells in the upper chamber were removed, inserts were individually stained with Diff-Quick method (International Reagents Corp., Kobe, Japan), and the migrated cells adherent to the underside of the filter were examined, counted, and photographed under a light microscope at  $\times 200$  magnification.

## Statistical analysis

Data are presented as means  $\pm$  S.E.M. of more than three independent experiments performed in triplicate. In case of Western blots, a representative figure is depicted. Comparisons between multiple groups were performed with ANOVA with Bonferroni's test using GraphPad Prism (La Jolla, CA). Statistical significance was considered at  $P < 0.05$ .

## ACKNOWLEDGMENTS

The authors would like to thank Ms. Jessica A. Daigle for editing the manuscript.

## CONFLICTS OF INTEREST

The authors have no conflicts of interest to disclose.

## GRANT SUPPORT

The study was supported by grants from the National Cancer Institute/National Institutes of Health (U01CA14920), Department of Defense (W81XWH-09-1-0200) and the American Cancer Society (RSGT-09-248-01-CCE) to A. B. Abdel-Mageed.

## REFERENCES

1. Siegel RL, Miller KD, Jemal A. Cancer Statistics, 2015. *CA Cancer J Clin.* 2015; 65:5–29.
2. Singer EA, Golijanin DJ, Miyamoto H, Messing EM. Androgen deprivation therapy for prostate cancer. *Expert Opin Pharmacother.* 2008; 9:211–128.
3. Gunter JH, Sarkar PL, Lubik AA, Nelson CC. New players for advanced prostate cancer and the rationalisation of insulin-sensitising medication. *Int J Cell Biol.* 2013. doi: 10.1155/2013/834684.
4. Marino M, Galluzzo P, Ascenzi P. Estrogen signaling multiple pathways to impact gene transcription. *Curr Genomics.* 2006; 7:497–508.
5. Kim H, Abd Elmageed ZY, Ju J, Naura AS, Abdel-Mageed AB, Varughese S, Paul D, Alahari S, Catling A, Kim JG, Boulares AH. PDZK1 is a novel factor in breast cancer that is indirectly regulated by estrogen through IGF-1R and promotes estrogen-mediated growth. *Mol Med.* 2013; 19:253–262.
6. Abd Elmageed YZ, Moroz K, Srivastav SK, Fang Z, Crawford BE, Moparty K, Thomas R, Abdel-Mageed AB. High circulating estrogens and selective expression of ERbeta in prostate tumors of Americans: implications for racial disparity of prostate cancer. *Carcinogenesis.* 2013; 34:2017–2023.
7. Piccolella M, Crippa V, Messi E, Tetel MJ, Poletti A. Modulators of estrogen receptor inhibit proliferation and migration of prostate cancer cells. *Pharmacol Res.* 2014; 79:13–20.
8. Nakajima Y, Akaogi K, Suzuki T, Osakabe A, Yamaguchi C, Sunahara N, Ishida J, Kako K, Ogawa S, Fujimura T, Homma Y, Fukamizu A, Murayama A, et al. Estrogen regulates tumor growth through a nonclassical pathway that includes the transcription factors ERbeta and KLF5. *Sci Signaling.* 2011; 4:168.
9. Gasi Tandefelt D, Boormans J, Hermans K, Trapman J. ETS fusion genes in prostate cancer. *Endocr Relat Cancer.* 2014; 21:R143–152.
10. Oh S, Shin S, Janknecht R. ETV1, 4 and 5: an oncogenic subfamily of ETS transcription factors. *Biochim Biophys Acta.* 2012; 1826:1–12.
11. Pellicchia A, Pescucci C, De Lorenzo E, Luceri C, Passaro N, Sica M, Notaro R, De Angioletti M. Overexpression of ETV4 is oncogenic in prostate cells through promotion of both cell proliferation and epithelial to mesenchymal transition. *Oncogenesis.* 2012; 1:e20.
12. Setlur SR, Mertz KD, Hoshida Y, Demichelis F, Lupien M, Perner S, Sboner A, Pawitan Y, Andr n O, Johnson LA, Tang J, Adami HO, Calza S, et al. Estrogen-dependent signaling in a molecularly distinct subclass of aggressive prostate cancer. *J Natl Cancer Inst.* 2008; 100:815–825.
13. B langer A, Candas B, Dupont A, Cusan L, Diamond P, Gomez JL, Labrie F. Changes in serum concentrations of conjugated and unconjugated steroids in 40- to 80-year-old men. *J Clin Endocrinol Metab.* 1994; 79:1086–1090.
14. Dey P, Jonsson P, Hartman J, Williams C, Str m A, Gustafsson J . Estrogen receptors  $\beta 1$  and  $\beta 2$  have opposing roles in regulating proliferation and bone metastasis genes in the prostate cancer cell line PC3. *Mol Endocrinol.* 2012; 26:1991–2003.
15. Mohler JL, Gregory CW, Ford OH, Kim D, Weaver CM,

- Petrusz P, Wilson EM, French FS. The androgen axis in recurrent prostate cancer. *Clin Cancer Res.* 2004; 10:440–448.
16. Montgomery RB, Mostaghel EA, Vessella R, Hess DL, Kalhorn TF, Higano CS, True LD, Nelson PS. Maintenance of intratumoral androgens in metastatic prostate cancer: a mechanism for castration-resistant tumor growth. *Cancer Res.* 2008; 68:4447–4454.
  17. Muthusamy S, Andersson S, Kim HJ, Butler R, Waage L, Bergerheim U, Gustafsson JÅ. Estrogen receptor beta and 17beta-hydroxysteroid dehydrogenase type 6, a growth regulatory pathway that is lost in prostate cancer. *Proc Natl Acad Sci USA.* 2011; 108:20090–20094.
  18. Nakamura H, Wang Y, Xue H, Romanish MT, Mager DL, Helgason CD, Wang Y. Genistein versus ICI 182, 780: An ally or enemy in metastatic progression of prostate cancer. *Prostate.* 2013; 73:1747–1760.
  19. Fixemer T, Remberger K, Bonkoff H. Differential expression of estrogen receptor beta in human prostate tissue, premalignant changes and in primary, metastatic and recurrent prostatic adenocarcinoma. *Prostate.* 2003; 54:79–87.
  20. Hu WY, Shi GB, Hu DP, Ho SM, Madueke IC, Kajdacsy-Balla A, Prins GS. Estrogen-initiated transformation of prostate epithelium derived from normal human prostate stem-progenitor cells. *Endocrinology.* 2011; 152:2150–2163.
  21. Aimes RT, Zijlstra A, Hooper JD, Ogbourne SM, Sit ML, Fuchs S, Gotley DC, Quigley JP, Antalis TM. Endothelial cell serine proteases expressed during vascular morphogenesis and angiogenesis. *Thromb Haemost.* 2003; 89:61–72.
  22. Lubik AA, Gunter JH, Hollier BG, Ettinger S, Fazli L, Stylianou N, Hendy SC, Adomat HH, Gleave ME, Pollak M, Herington A, Nelson CC. IGF2 increases de novo steroidogenesis in prostate cancer cells. *Endocr Relat Cancer.* 2013;20:173–186.
  23. Yu H, Rohan T. Role of the insulin-like growth factor family in cancer development and progression. *J Natl Canc Inst.* 2000;92:1472–1489.
  24. Vidal SJ, Rodriguez-Bravo V, Quinn SA, Rodriguez-Barrueco R, Lujambio A, Williams E, Sun X, de la Iglesia-Vicente J, Lee A, Readhead B, Chen X, Galsky M, Esteve B, et al. A targetable GATA2-IGF2 axis confers aggressiveness in lethal prostate cancer. *Cancer Cell.* 2015; 27:223–239.
  25. Tomlins SA, Rhodes DR, Perner S, Dhanasekaran SM, Mehra R, Sun XW, Varambally S, Cao X, Tchinda J, Kuefer R, Lee C, Montie JE, Shah RB, et al. Recurrent fusion of TMPRSS2 and ETS transcription factor genes in prostate cancer. *Science.* 2005; 310:644–648.
  26. Helgeson BE, Tomlins SA, Shah N, Laxman B, Cao Q, Prensner JR, Cao X, Singla N, Montie JE, Varambally S, Mehra R, Chinnaiyan AM. Characterization of TMPRSS2:ETV5 and SLC45A3:ETV5 gene fusions in prostate cancer. *Cancer Res.* 2008; 68:73–80.
  27. Kao CJ, Martiniez A, Shi XB, Yang J, Evans CP, Dobi A, deVere White RW, Kung HJ. miR-30 as a tumor suppressor connects EGF/Src signal to ERG and EMT. *Oncogene.* 2014; 33:2495–2503.
  28. Wang J, Cai Y, Shao LJ, Siddiqui J, Palanisamy N, Li R, Ren C, Ayala G, Ittmann M. Activation of NF-κB by TMPRSS2/ERG fusion isoforms through Toll-like receptor-4. *Cancer Res.* 2011; 71:1325–1333.
  29. Abd Elmageed ZY, Yang Y, Thomas R, Ranjan M, Mondal D, Moroz K, Fang Z, Rezk BM, Moparty K, Sikka SC, Sartor O, Abdel-Mageed AB. Neoplastic reprogramming of patient-derived adipose stem cells by prostate cancer cell-associated exosomes. *Stem Cells.* 2014; 32:983–997.
  30. Morales A, Gonzalez M, Marin R, Diaz M, Alonso R. Estrogen inhibition of norepinephrine responsiveness is initiated at the plasma membrane of GnRH-producing GT1-7 cells. *J Endocrinol.* 2007; 194:193–200.
